# Supplementary material for: The Allelopathic Activity of Extracts and Isolated from Spirulina platensis
Source: MDPI journal article supplement (doi:10.3390/molecules27123852), 2022-06-15
Supplement: s1 [file s1]

# The Allelopathic Activity of Extracts and Isolated from *Spirulina platensis*

Patchanee Charoenying <sup>1,\*</sup>, Chamroon Laosinwattana <sup>2</sup>, and Nawasit Chotsaeng <sup>1,3</sup>

<sup>1</sup> Department of Chemistry, School of Science, King Mongkut's Institute of Technology Ladkrabang, Bangkok 10520, Thailand; nawasit.ch@kmitl.ac.th

<sup>2</sup> Department of Plant Production Technology, School of Agricultural Technology, King Mongkut's Institute of Technology Ladkrabang, Bangkok 10520, Thailand; klchamro@kmitl.ac.th

<sup>3</sup> Integrated Applied Chemistry Research Unit, School of Science, King Mongkut's Institute of Technology Ladkrabang, Bangkok 10520, Thailand

\* Correspondence: patchanee.ch@kmitl.ac.th; Tel.: +66-2329-8400 (ext. 6241)

**Table S1.** Allelopathic effects of E1–E23 fractions from crude ethyl acetate extract on seed germination of Chinese amaranth.

| Fractions | % Inhibition on seed germination |         |          |          |
|-----------|----------------------------------|---------|----------|----------|
|           | 250 ppm                          | 500 ppm | 1000 ppm | 2000 ppm |
| Control   | 0a                               | 0a      | 0de      | 0j       |
| E1        | −3.03a                           | 6.06a   | 3.03c-e  | 36.36e   |
| E2        | 3.03a                            | −3.03a  | 15.15bc  | 69.70c   |
| E3        | 0a                               | 0a      | 9.09b-d  | 21.21f-h |
| E4        | 0a                               | 3.03a   | 6.06b-e  | 30.30ef  |
| E5        | −3.03a                           | 3.03a   | 15.15bc  | 72.73c   |
| E6        | −3.03a                           | 0a      | 36.36a   | 84.85b   |
| E7        | 3.03a                            | 3.03a   | 15.15bc  | 66.67c   |
| E8        | 3.03a                            | 0a      | 3.03c-e  | 0j       |
| E9        | −3.03a                           | 0a      | 0de      | 0j       |
| E10       | 0a                               | 0a      | 0de      | 15.15h   |
| E11       | 0a                               | −3.03a  | 18.18b   | 72.73c   |
| E12       | 0a                               | 0a      | 3.03c-e  | 90.91ab  |
| E13       | 0a                               | 3.03a   | 42.42a   | 100a     |
| E14       | −3.03a                           | −3.03a  | 0de      | 51.52d   |
| E15       | 0a                               | 3.03    | 6.06b-e  | 12.12hi  |
| E16       | −3.03a                           | −3.03   | 0de      | 3.03ij   |
| E17       | −3.03a                           | 0a      | 0de      | 0j       |
| E18       | −6.06a                           | 0a      | 3.03c-e  | 3.03ij   |
| E19       | −6.06a                           | 0a      | 0de      | 18.18gh  |
| E20       | −3.03a                           | −6.06a  | −6.06e   | −6.06j   |
| E21       | 0a                               | 0a      | 3.03c-e  | 15.15h   |
| E22       | −6.06a                           | −6.06a  | 3.03c-e  | 27.27e-g |
| E23       | −3.03a                           | 0a      | 15.15bc  | 21.21f-h |

Values with the same letters in each column there are not significantly different at  $p \leq 0.05$

**Table S2.** Allelopathic effects of E1-E23 fractions from crude ethyl acetate extract on seedling growth of Chinese amaranth.

| Fractions | % Inhibition on shoot growth |           |           |          | % Inhibition on root growth |           |           |          |
|-----------|------------------------------|-----------|-----------|----------|-----------------------------|-----------|-----------|----------|
|           | 250 ppm                      | 500 ppm   | 1000 ppm  | 2000 ppm | 250 ppm                     | 500 ppm   | 1000 ppm  | 2000 ppm |
| Control   | 0a                           | 0b-e      | 0e-g      | 0h-i     | 0a-d                        | 0a        | 0b        | 0g-i     |
| E1        | -2.11ab                      | -4.38c-g  | -14.91i-k | 16.21ef  | -11.06e-g                   | -29.05g   | -34.67hi  | -3.06hi  |
| E2        | -13.45cd                     | -4.38c-g  | -11.51h-j | 20.10e   | -25.53ij                    | -2.81a-c  | 0b        | 43.02d   |
| E3        | -16.69d                      | -14.59i-k | -29.66l   | -12.32j  | -26.83ij                    | -27.54fg  | -43.22i   | -15.88jk |
| E4        | -4.86a-c                     | -3.73c-f  | -18.31jk  | 7.62f-h  | -22.81hi                    | -28.34g   | -23.32fh  | 7.84fg   |
| E5        | -6.00a-c                     | -14.10h-k | -1.62e-h  | 87.03b   | -1.51a-e                    | -18.59d-f | -16.68e-g | 83.92bc  |
| E6        | -0.65ab                      | 10.86a    | 68.40a    | 90.28ab  | -3.22a-f                    | 0.10a     | 69.95a    | 89.95b   |
| E7        | -14.42cd                     | -1.30b-e  | 10.86b-d  | 34.04d   | -33.97jk                    | -11.16cd  | -3.52b-d  | 48.74d   |
| E8        | -17.67d                      | -11.18f-i | -11.67h-j | -3.08ij  | -18.39g-i                   | -11.76cd  | -15.78d-g | -8.54ij  |
| E9        | -14.26cd                     | -27.55l   | -23.01kl  | -29.17k  | 1.61a-c                     | -18.79d-f | -23.02fh  | -26.63l  |
| E10       | -21.72d                      | -15.07i-k | -9.24g-j  | 0.65g-i  | -35.48jk                    | -21.61fg  | -6.63b-e  | 8.84fg   |
| E11       | -34.85e                      | -21.88kl  | -11.83h-j | 74.88c   | -41.91k                     | -11.46cd  | -8.94b-e  | 78.89cc  |
| E12       | -15.07cd                     | -12.80g-j | -6.00f-i  | 85.41b   | -13.57f-h                   | -5.93a-c  | -14.67c-g | 75.88c   |
| E13       | -19.29d                      | -20.75j-l | -15.88i-k | 100a     | -9.95d-g                    | -8.44a-c  | -23.52fh  | 100a     |
| E14       | -15.40cd                     | -9.08e-i  | 1.13d-g   | 91.09ab  | -18.59g-i                   | -22.11fg  | 1.31b     | 79.90c   |
| E15       | -11.18b-d                    | -11.02f-i | -12.97i-k | 11.02eg  | -19.50g-i                   | -10.85cd  | -24.02fh  | -6.93i   |
| E16       | -5.51a-c                     | -13.13g-j | -13.00i-k | -12.16j  | -7.34c-f                    | -12.06c-e | -26.23gh  | -28.04l  |
| E17       | -5.51a-c                     | -5.51d-h  | -12.97i-k | -11.99j  | -6.33c-f                    | -21.06e-g | -37.69i   | -20.10kl |
| E18       | 0.81a                        | -1.62c-e  | -5.19e-i  | -3.24ij  | -2.71a-f                    | -5.53a-c  | -18.69e-g | 4.22gh   |
| E19       | -5.83a-c                     | -3.73c-f  | -0.97e-h  | 39.22d   | -5.53b-f                    | -10.05b-d | -12.66c-f | 48.44d   |
| E20       | 0.49a                        | -2.43c-f  | 4.38c-f   | 8.75f-h  | 4.92ab                      | -11.16cd  | 3.42b     | 2.21gh   |
| E21       | 3.57a                        | 3.08a-d   | 5.35c-e   | 8.27f-h  | 5.73a                       | -2.31a-c  | -7.54b-e  | 14.57f   |
| E22       | 2.76a                        | 7.13ab    | 18.48b    | 35.17d   | 2.91a-c                     | -1.01ab   | -2.41bc   | 42.71d   |
| E23       | 2.43a                        | 3.73a-c   | 11.67bc   | 36.30d   | -1.51a-e                    | -10.15b-d | -7.04b-e  | 32.66e   |

Values with the same letters in each column there are not significantly different at  $p \leq 0.05$

**Table S3.** Allelopathic effects of E1-E3 fractions from crude ethyl acetate extract on seed germination of barnyardgrass.

| Fractions | % Inhibition on seed germination |         |          |          |
|-----------|----------------------------------|---------|----------|----------|
|           | 250 ppm                          | 500 ppm | 1000 ppm | 2000 ppm |
| Control   | 0a                               | 0b      | 0b       | 0c       |
| E1        | −5.26a                           | 0b      | 5.26b    | 5.26c    |
| E2        | 0a                               | 2.63ab  | 2.63b    | 0c       |
| E3        | 5.26a                            | 5.26ab  | 5.26b    | 2.63c    |
| E4        | 0a                               | 2.63ab  | 0b       | 0c       |
| E5        | −2.63a                           | 2.63ab  | 7.89b    | 18.42b   |
| E6        | 0a                               | 18.42a  | 71.05a   | 92.11a   |
| E7        | 0a                               | 2.63ab  | 2.63b    | 0c       |
| E8        | 2.63a                            | −2.63b  | 2.63b    | 0c       |
| E9        | 0a                               | 0b      | 2.63b    | 5.26c    |
| E10       | 2.63a                            | −2.63b  | 2.63b    | 7.89bc   |
| E11       | 0a                               | 0b      | 5.26b    | 7.89bc   |
| E12       | 2.63a                            | 5.26ab  | 0b       | −2.63c   |
| E13       | 0a                               | 5.26ab  | 0b       | 2.63c    |
| E14       | 5.26a                            | −2.63b  | 5.26b    | 7.89bc   |
| E15       | 2.63a                            | 5.26ab  | 5.26b    | 0c       |
| E16       | −5.26a                           | 0b      | 0b       | 0c       |
| E17       | 2.63a                            | 0b      | 2.63b    | −2.63c   |
| E18       | 5.26a                            | −2.63b  | −2.63b   | 2.63c    |
| E19       | −2.63a                           | 5.26ab  | −2.63b   | 5.26c    |
| E20       | 0a                               | 5.26ab  | 2.63b    | 2.63c    |
| E21       | 2.63a                            | 2.63ab  | 0b       | 0c       |
| E22       | 5.26a                            | 2.63ab  | 5.26b    | 2.63c    |
| E23       | 0a                               | 5.26ab  | 5.26b    | 5.26c    |

Values with the same letters in each column there are not significantly different at  $p \leq 0.05$

**Table S4.** Allelopathic effects of E1-E23 fractions from crude ethyl acetate extract on seedling growth of barnyardgrass.

| Fractions | % Inhibition on shoot growth |         |          |          | % Inhibition on root growth |         |          |          |
|-----------|------------------------------|---------|----------|----------|-----------------------------|---------|----------|----------|
|           | 250 ppm                      | 500 ppm | 1000 ppm | 2000 ppm | 250 ppm                     | 500 ppm | 1000 ppm | 2000 ppm |
| Control   | 0ab                          | 0bc     | 0c       | 0d       | 0a                          | 0ab     | 0c-f     | 0g       |
| E1        | −7.85b                       | 4.78bc  | −0.18c   | 6.84cd   | −5.18ab                     | 2.59ab  | −5.53fg  | 0.82g    |
| E2        | −3.12ab                      | −2.43bc | −3.12c   | −3.45d   | −0.59a                      | −3.41bc | −10.12g  | −17.76h  |
| E3        | 3.45ab                       | 0.69bc  | 5.74bc   | 2.62cd   | 0.59a                       | −11.53c | 6.12c-e  | 7.06e-g  |
| E4        | 3.63ab                       | 6.20bc  | 6.16bc   | 6.56cd   | 7.41a                       | 4.35ab  | 2.94c-f  | 6.82e-g  |
| E5        | 4.73a                        | 6.34bc  | 12.10b   | 30.11b   | 5.18a                       | 1.18ab  | 25.88b   | 46.71b   |
| E6        | 5.24a                        | 16.77a  | 44.88a   | 49.47a   | −16.47b                     | −4.71bc | 52.94a   | 72.12a   |
| E7        | 4.23a                        | 0.64bc  | 0.41bc   | 6.29cd   | 7.06a                       | −4.24bc | 1.18c-f  | 20d      |
| E8        | 3.26ab                       | −1.06bc | −2.02c   | 5.28cd   | 3.29a                       | 7.29a   | 0c-f     | 15.41d-f |
| E9        | −4.09ab                      | −3.90c  | 2.94bc   | 4.36cd   | −3.88ab                     | 2.35ab  | 0.82c-f  | 7.18e-g  |
| E10       | −3.63ab                      | 3.49bc  | 5.47bc   | 1.52cd   | −0.24a                      | 2.71ab  | 6.12c-e  | 0.71g    |
| E11       | 3.72ab                       | 5.10bc  | 3.49bc   | 4.78cd   | 3.88a                       | −3.53bc | 6.24c-e  | 2.47g    |
| E12       | 2.16ab                       | 3.90bc  | 7.49bc   | 5.37cd   | 5.53a                       | 8.35a   | 6.24c-e  | 2.35g    |
| E13       | 3.17ab                       | −2.53bc | 5.93bc   | 3.12cd   | 3.06a                       | −3.53bc | 5.53c-e  | −1.18g   |
| E14       | 5.14a                        | 7.44b   | 8.22bc   | 1.33d    | 8.24a                       | 5.06ab  | 5.88c-e  | −3.65g   |
| E15       | 0.87ab                       | 1.65bc  | 4.23bc   | 6.02cd   | 3.29a                       | 2.24ab  | 7.06cd   | 6fg      |
| E16       | 3.22ab                       | 5.51bc  | 5.05bc   | 6.20cd   | 5.29a                       | 3.76ab  | −1.53d-f | 7.53e-g  |
| E17       | 4.04a                        | 3.40bc  | 5.93bc   | 2.66cd   | 1.06a                       | 2.35ab  | 5.88c-e  | 5.76fg   |
| E18       | −1.93ab                      | 4.13bc  | 3.03bc   | 3.26cd   | −1.65a                      | 5.18ab  | 6c-e     | 2.71g    |
| E19       | 2.94ab                       | 5.10bc  | 2.89bc   | 8.22cd   | 8.12a                       | 3.65ab  | 6.71cd   | 16.12d-f |
| E20       | 4.00a                        | 4.00bc  | 4.32bc   | 4.09cd   | 6a                          | 7.06a   | 8.24c    | 17.53de  |
| E21       | 3.77ab                       | −1.42bc | 2.89bc   | 10.51cd  | 7.18a                       | −0.82ab | 26b      | 31.18c   |
| E22       | 2.25ab                       | 3.17bc  | 4.59bc   | 16.35c   | 1.88a                       | −0.12ab | 5.18c-e  | 36.24c   |
| E23       | 2.89ab                       | 3.26bc  | −0.28c   | 10.28cd  | −0.71a                      | 7.88a   | −2.82e-g | 16.47d-f |

Values with the same letters in each column there are not significantly different at  $p \leq 0.05$

## References for Supporting Materials

33. Charoenying, P.; Chotsaeng, P.; Laosinwattana, C. Effects of *Spirulina platensis* and C-phycocyanin on seed germination and seedling growth of two monocot and dicot plants. *Allelopathy J.*, **2010**, *25*, 453–464.
